# Supplementary material
Source: publisher site journal article supplement (https://www.spandidos-publications.com/1319/downloadSupplementary)
Supplement: Supplementary file 1 [file downloadSupplementary]

Table SV. Classification and evidence of 47 variants.

| Gene  | AA change      | Classification | Truncation | PVS1                                                                                                                | PS3                          | PM1                  | PM2                | PM3                                    | PM4                             | PM5                                                                                                                               | PP1                                                            | PP3                  | PP5                                                     | BS3                                                                                                             | BP4                                                                                |
|-------|----------------|----------------|------------|---------------------------------------------------------------------------------------------------------------------|------------------------------|----------------------|--------------------|----------------------------------------|---------------------------------|-----------------------------------------------------------------------------------------------------------------------------------|----------------------------------------------------------------|----------------------|---------------------------------------------------------|-----------------------------------------------------------------------------------------------------------------|------------------------------------------------------------------------------------|
|       |                |                |            | Well-established in vitro or in vivo functional studies supportive of a damaging effect on the gene or gene product | Located in functional domain | gnomAD (East Asian)  | 1000 genomes (CHB) | A pathogenic variant detected in trans | Protein length changing variant | Novel missense change at an amino acid residue where a different missense change determined to be pathogenic has been seen before | Cosegregation with disease in multiple affected family members | In silico prediction | Reputable source recently reports variant as pathogenic | Well-established in vitro or in vivo functional studies show no damaging effect on protein function or splicing | Multiple lines of computational evidence suggest no impact on gene or gene product |
| TSHR  | p.R450H        | P              |            |                                                                                                                     | Yes (Narumi et al., 2011)    |                      | 0.002597           | 0.0049                                 |                                 | Yes (Narumi et al., 2011)                                                                                                         |                                                                | D                    | Yes                                                     |                                                                                                                 |                                                                                    |
| TSHR  | p.K618*        | P              | Yes        |                                                                                                                     |                              |                      | 0                  | 0                                      |                                 | Yes (this study)                                                                                                                  |                                                                | D                    | Yes                                                     |                                                                                                                 |                                                                                    |
| DUOX2 | IVS28+1G>T     | P              | Yes        |                                                                                                                     |                              |                      | 0.001537           | 0                                      |                                 | Yes (Chen et al., 2018)                                                                                                           |                                                                |                      |                                                         |                                                                                                                 |                                                                                    |
| DUOX2 | p.R1110Q       | P              |            |                                                                                                                     | Yes (Narumi et al., 2011)    |                      | 0.002597           | 0.0025                                 |                                 | Yes (this study)                                                                                                                  |                                                                | D                    | Yes                                                     |                                                                                                                 |                                                                                    |
| DUOX2 | p.E879K        | P              |            |                                                                                                                     | Yes(Jin et al., 2014)        | EF hand              | 0.000954           | 0                                      |                                 | Yes (this study and Fu et al., 2015)                                                                                              | Yes(Maruo et al.,2008)                                         | D                    | Yes                                                     |                                                                                                                 |                                                                                    |
| DUOX2 | p.T803fs       | P              | Yes        |                                                                                                                     |                              |                      | 0                  | 0                                      |                                 |                                                                                                                                   |                                                                | D                    | Yes                                                     |                                                                                                                 |                                                                                    |
| DUOX2 | p.R625*        | P              | Yes        |                                                                                                                     |                              |                      | 0                  | 0                                      |                                 | Yes (this study)                                                                                                                  |                                                                | D                    |                                                         |                                                                                                                 |                                                                                    |
| DUOX2 | p.G624fs       | P              | Yes        |                                                                                                                     |                              |                      | 0.0004638          | 0                                      |                                 | Yes (this study)                                                                                                                  |                                                                | D                    |                                                         |                                                                                                                 |                                                                                    |
| DUOX2 | p.K530*        | P              | Yes        |                                                                                                                     |                              | Heme peroxidase-like | 0.009274           | 0.009244                               |                                 | Yes (this study)                                                                                                                  | Yes(Maruo et al.,2008)                                         |                      | Yes                                                     |                                                                                                                 |                                                                                    |
| DUOX2 | p.R434*        | P              | Yes        |                                                                                                                     |                              | Heme peroxidase-like | 0.000116           | 0                                      |                                 |                                                                                                                                   |                                                                | D                    |                                                         |                                                                                                                 |                                                                                    |
| DUOX2 | p.R434_S440del | P              | Yes        |                                                                                                                     |                              | Heme peroxidase-like | 0                  | 0                                      | YES                             |                                                                                                                                   | Yes (Vigone et al., 2005)                                      | D                    |                                                         |                                                                                                                 |                                                                                    |
| TPO   | p.E757*        | P              | Yes        |                                                                                                                     |                              |                      | 0.00159            | 0                                      |                                 |                                                                                                                                   | Yes(Niu et                                                     | D                    | Yes                                                     |                                                                                                                 |                                                                                    |

|        |           |     |                                     |                            |            |          |                           |     |                           |     |
|--------|-----------|-----|-------------------------------------|----------------------------|------------|----------|---------------------------|-----|---------------------------|-----|
|        |           |     |                                     |                            |            |          |                           |     | al.,2002)                 |     |
| TG     | p.E955fs  | P   | Yes                                 | type-1 8                   | 0.00005798 | 0        | Yes (this study)          |     |                           | D   |
| TG     | p.L2282fs | P   | Yes                                 | ACHE-like domain           | 0          | 0        | Yes (this study)          |     |                           | D   |
| DUOX2  | p.G1521*  | LP  |                                     | NADPH binding              | 0.001044   | 0.000809 | Yes (this study)          |     |                           |     |
| DUOX2  | p.Y1415C  | LP  |                                     | NADPH binding              | 0.00008334 | 0        | Yes (this study)          |     |                           | D   |
| DUOX2  | p.R432H   | LP  |                                     | Heme peroxidase-like       | 0.0004769  | 0.0007   | Yes (this study)          |     |                           | D   |
| DUOX2  | p.D137E   | LP  |                                     | Heme peroxidase-like       | 0          | 0        | Yes (this study)          |     |                           | D   |
| TSHR   | p.C176R   | LP  |                                     | Leucine-rich repeat domain | 0          | 0        | Yes (this study)          |     |                           | D   |
| TSHR   | p.R528S   | LP  |                                     |                            | 0          | 0        | Yes (this study)          |     |                           | Yes |
| DUOX2  | p.A1206T  | LP  | Yes (Liu et al., 2016)              |                            | 0.0001739  | 0        |                           |     |                           |     |
| DUOX2  | p.R885L   | LP  |                                     | EF hand                    | 0.005777   | 0.0049   | Yes (this study)          | Yes | Yes(Zheng et al.,2017)    | Yes |
| DUOX2  | p.R376W   | LP  |                                     | Heme peroxidase-like       | 0          | 0        | Yes (Vigone et al., 2005) |     | Yes (Vigone et al., 2005) | Yes |
|        |           |     | Yes                                 |                            |            |          |                           |     |                           |     |
| TPO    | p.R361L   | LP  | (Yoshizawa-Ogasawara, et al., 2016) |                            | 0.009273   | 0.0194   |                           |     |                           |     |
| DUOX2  | p.V779M   | VUS |                                     |                            | 0.004094   | 0.0056   |                           |     |                           |     |
| DUOX2  | p.F591S   | VUS |                                     |                            | 0.00007081 | 0        |                           |     |                           | D   |
| DUOX2  | p.V407F   | VUS |                                     | Heme peroxidase-like       | 0          | 0        |                           |     |                           |     |
| DUOX2  | p.E389K   | VUS |                                     | Heme peroxidase-like       | 0          | 0        |                           |     |                           | B   |
| DUOX42 | p.R94C    | VUS |                                     |                            | 0          | 0        | Yes (this study)          |     |                           |     |
| SLC5A5 | p.Q639*   | VUS |                                     |                            | 0          | 0        |                           |     |                           | B   |
| TPO    | p.S309P   | VUS |                                     |                            | 0          | 0        |                           |     |                           |     |
| TPO    | p.S571R   | VUS |                                     |                            | 0          | 0        |                           |     |                           |     |

|                |          |     |                    |            |        |                        |                                     |   |
|----------------|----------|-----|--------------------|------------|--------|------------------------|-------------------------------------|---|
| <i>TPO</i>     | p.R846W  | VUS |                    | 0.00159    | 0.0049 |                        |                                     |   |
| <i>PROPI</i>   | p.G51V   | VUS |                    | 0.002151   | 0      |                        |                                     |   |
| <i>SLC26A4</i> | p.Y78H   | VUS |                    | 0          | 0      | Yes (Guo et al., 2010) | D                                   |   |
|                |          |     | SLC26A/SulP        |            |        |                        |                                     |   |
| <i>SLC26A4</i> | p.A434T  | VUS | transporter domain | 0          | 0      |                        |                                     |   |
| <i>SLC26A4</i> | p.Y578H  | VUS | STAS domain        | 0          | 0      |                        | D                                   |   |
| <i>TRHR</i>    | p.I168M  | VUS |                    | 0.00212    | 0.0049 |                        |                                     |   |
| <i>TG</i>      | p.N212S  | VUS | type-1 3           | 0.002122   | 0      |                        |                                     |   |
| <i>TG</i>      | p.R896Q  | VUS | type-1 7           | 0.0007431  | 0.0049 |                        |                                     |   |
| <i>TG</i>      | p.V1738I | VUS | Type IIIB          | 0.001325   | 0.0097 |                        |                                     | B |
| <i>TG</i>      | p.S1912N | VUS | Type IIIA          | 0          | 0      |                        |                                     | B |
| <i>TG</i>      | p.I1931V | VUS | Type IIIA          | 0.002391   | 0.0146 |                        |                                     | B |
| <i>TG</i>      | p.I2394M | VUS | ACHE-like domain   | 0.00005798 | 0      |                        |                                     |   |
| <i>TG</i>      | p.R2585W | VUS | ACHE-like domain   | 0.005379   | 0.0049 |                        |                                     |   |
|                |          |     |                    |            |        |                        | B                                   |   |
| <i>TPO</i>     | p.P883S  | LB  |                    | 0.005409   | 0.0146 | Yes (Ma et al., 2015)  | (Yoshizawa-Ogasawara, et al., 2016) | B |

P, pathogenic; LP, likely pathogenic; VUS, variants of uncertain significance; LB, likely benign; D, damaged; B, benign; CHB, Han Chinese in Beijing, China; PVS1, null variant (nonsense, frameshift, canonical ±1 or 2 splice sites, initiation codon, single or multi-exons deletion) in a gene where LOF is a known mechanism of disease; PS3, well-established in vitro or in vivo functional studies supportive of a damaging effect on the gene or gene product; PM1, located in a mutational hot spot and/or critical and well-established functional domain; PM2, Absent from controls (or at extremely low frequency if recessive) in public population databases; PM3, for recessive disorders, detected in trans with a pathogenic variant; PM4, protein length changes as a result of in-frame deletions/insertions in a non-repeat region, or stop-loss variants; PM5, Novel missense change at an amino acid residue where a different missense change determined to be pathogenic has been seen before; PP1, Cosegregation with disease in multiple affected family members in a gene definitively known to cause the disease; PP3, multiple lines of computational evidence support a deleterious effect on the gene or gene product (detailed prediction results shown in Tables S6); PP5, Reputable source recently reports variant as pathogenic, but the evidence is not available to the laboratory to perform an independent evaluation; BS3, Well-established *in vitro* or *in vivo* functional studies show no damaging effect on protein function or splicing; BP4, Multiple lines of computational evidence suggest no impact on gene or gene product (including conservation, evolutionary and splicing impact).
